# Supplementary material
Source: Springer Nature journal article supplement (https://www.springermedizin.de/resource/supplementary/13044_2012_71_MOESM2_ESM.pdf/9660074)

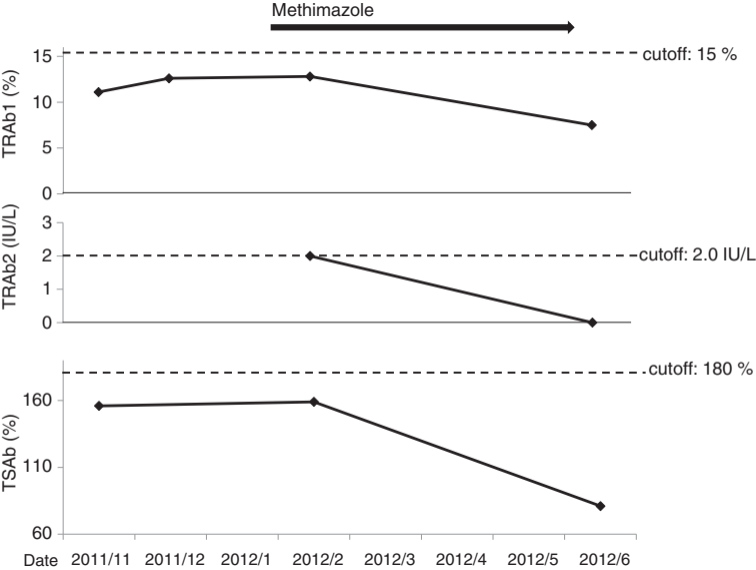

Supplement: MOESM2 [file 9660074]
